# Supplementary material for: The Effect of Combined Treatment of Psilocybin and Eugenol on Lipopolysaccharide-Induced Brain Inflammation in Mice
Source: MDPI journal article supplement (doi:10.3390/molecules28062624), 2023-03-14
Supplement: s1 [file s1]

## Supplementary Materials

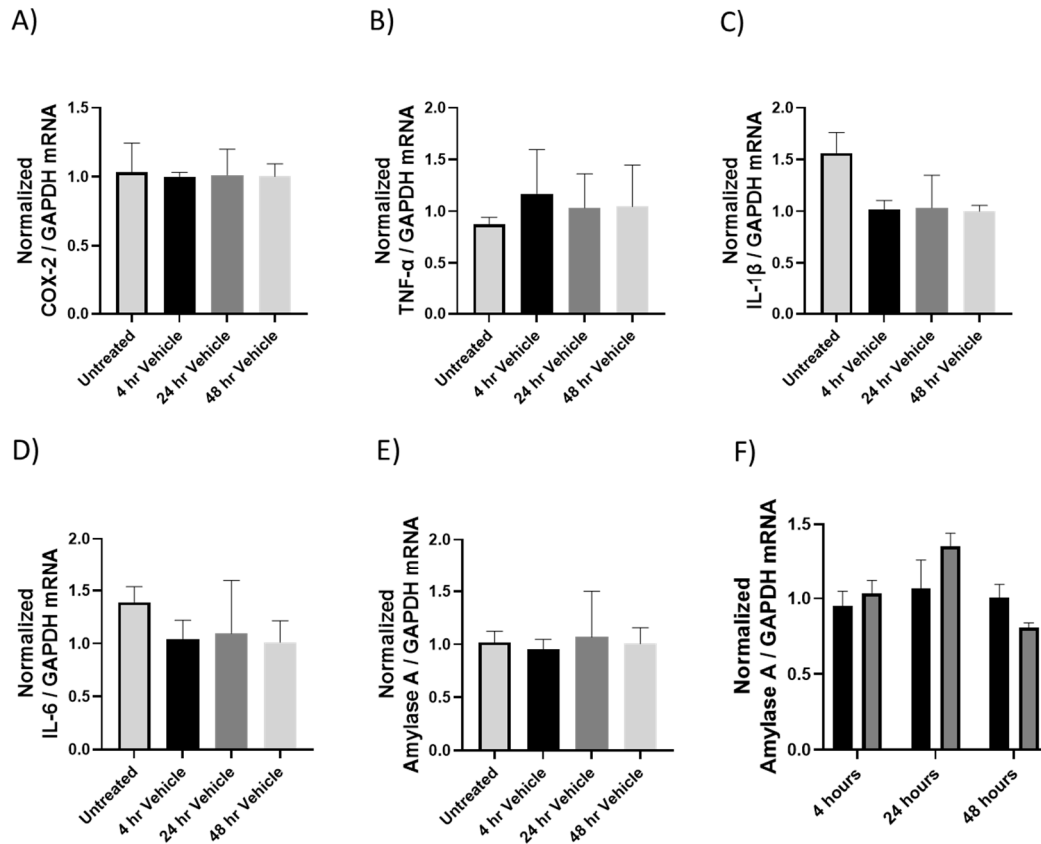

**Figure S1.** The effect of LPS i.p. injections on mRNA expression in brain tissue in Figure 1. Changes of mRNA expression as measured by RT-qPCR for: (A) COX-2 (B) TNF $\alpha$  (C) IL-1 $\beta$  (D) IL-6 (E, F) Amylase A. Glyceraldehyde-3-phosphate dehydrogenase (GAPDH) was used as a loading control. Data were analyzed with (A-E): Multiple t-tests (FDR: Q=5%, n=5-6) and (F): t-test (n=3-6). Bars represents Mean  $\pm$  SEM

A)

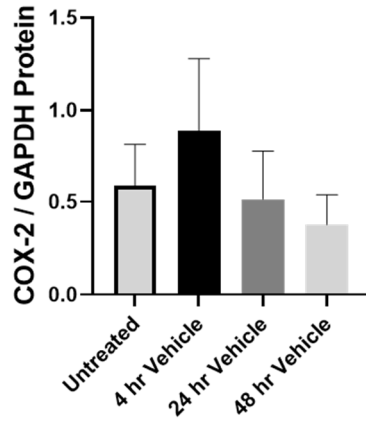

B)

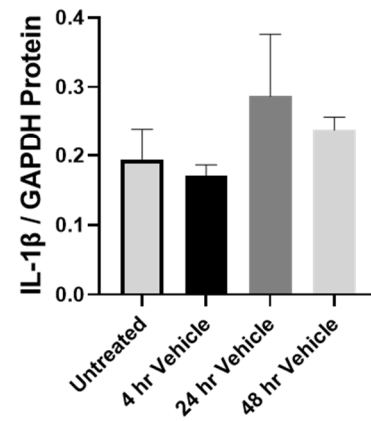

**Figure S2.** The effect of vehicle treatments on expression of COX2, IL-1 $\beta$ , GAPDH in 4h, 24h and 48h time points in Figure 2. Figures represents changed protein expression for selected genes measured by Western blot. Glyceraldehyde-3-phosphate dehydrogenase (GAPDH) was used as a loading control. Relative densitometry was presented as a ratio of target protein to GAPDH. (A) COX 2 expression (B) IL-1 $\beta$  expression. (A-B): ANOVA / Tukey (n=3). Bars represent Mean  $\pm$  SEM.

## COX-2 72 kDa in Figure 2

**Weight**

250 kDa

130 kDa

95 kDa

72 kDa

55 kDa

36 kDa

32 kDa

17 kDa

10 kDa

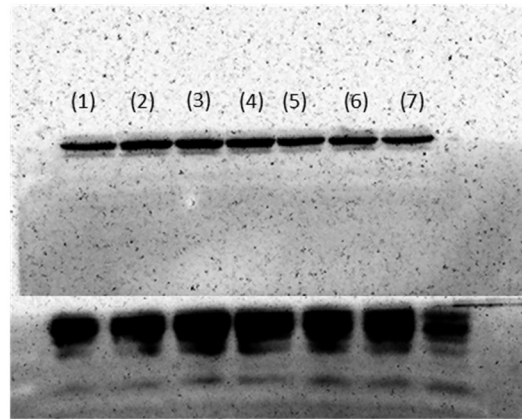

(1) Control

(2) Vehicle 4 hours

(3) LPS 4 hours

(4) Vehicle 24 hours

(5) LPS 24 hours

(6) Vehicle 48 hours

(7) LPS 48 hours

**Figure S3.** Original Western blots of brain tissue proteins showing COX-2 (molecular weight is 72 kDa). Red arrow indicates bands shown in Figure 2. This blot membrane has been cut in 2 pieces. Each piece received different exposure time and images has been taken separately.

## IL-1 $\beta$ 17 kDa in Figure 2

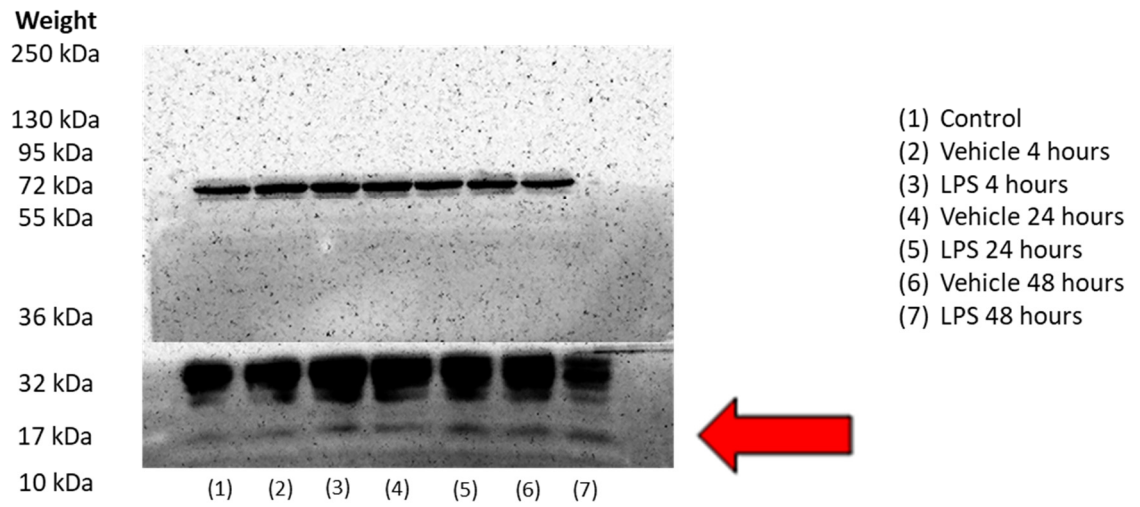

**Figure S4.** Original Western blots of brain tissue proteins showing IL-1 $\beta$  (molecular weight is 17 kDa). Red arrow indicates bands shown in Figure 2. This blot membrane has been cut in 2 pieces. Each piece received different exposure time and images has been taken separately.

## GAPDH 36 kDa in Figure 2

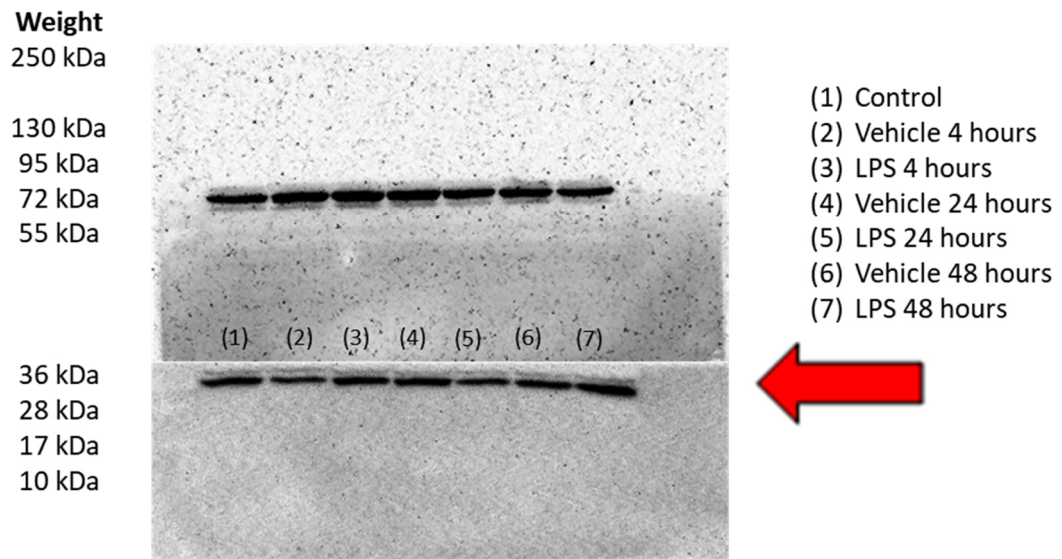

**Figure S5.** Original Western blots of brain tissue proteins showing GAPDH (molecular weight is 36 kDa). Red arrow indicates bands shown in Figure 2. This blot membrane has been cut in 2 pieces. Each piece received different exposure time and images has been taken separately. Bottom piece has been re-blotted and re-incubated with GAPDH.

## COX-2 72 kDa in Figure 6

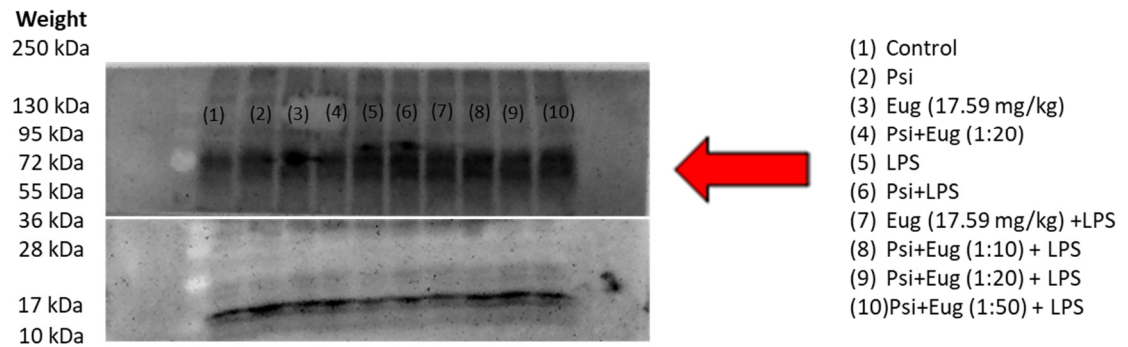

**Figure S6.** Original Western blots of brain tissue proteins showing COX-2 (molecular weight is 72 kDa). Red arrow indicates bands shown in Figure 6. This blot membrane has been cut in 2 pieces. Each piece received different exposure time and images has been taken separately.

## IL-1 $\beta$ 17 kDa in Figure 6

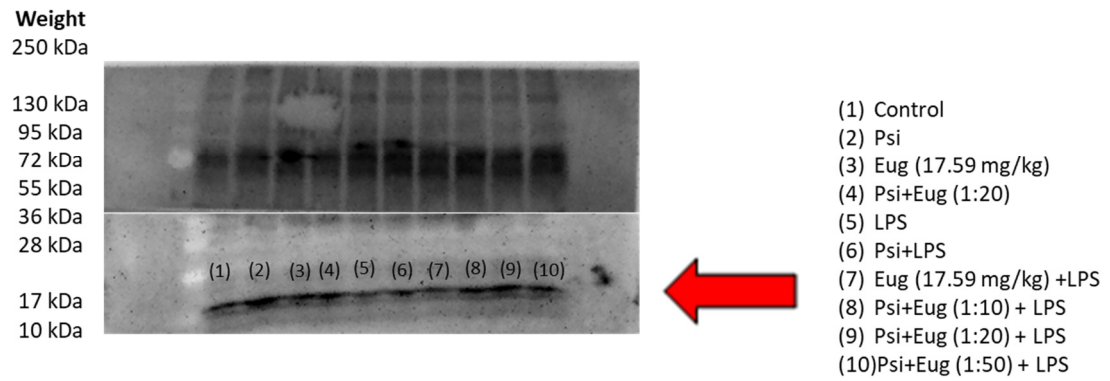

**Figure S7.** Original Western blots of brain tissue proteins showing IL-1 $\beta$  (molecular weight is 17 kDa). Red arrow indicates bands shown in Figure 6. This blot membrane has been cut in 2 pieces. Each piece received different exposure time and images has been taken separately.

## GAPDH 36 kDa in Figure 6

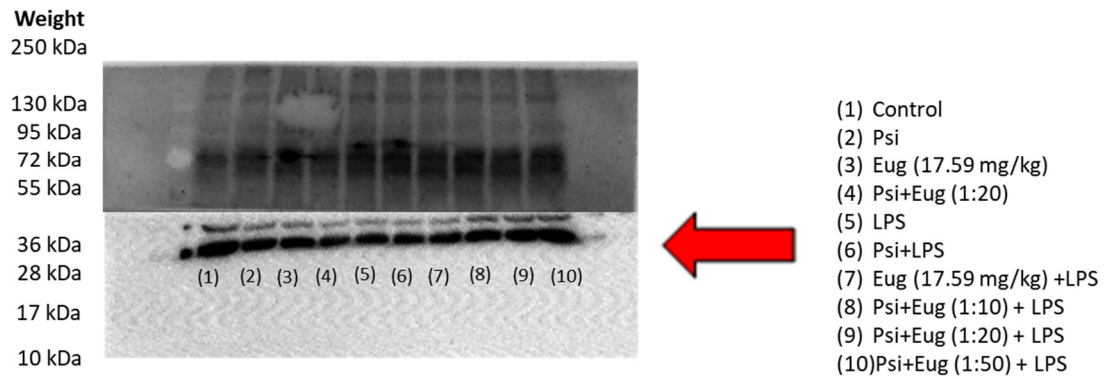

**Figure S8.** Original Western blots of brain tissue proteins showing GAPDH (molecular weight is 36 kDa). Red arrow indicates bands shown in Figure 6. This blot membrane has been cut in 2 pieces. Each piece received different exposure time and images has been taken separately. Bottom piece has been re-blotted and re-incubated with GAPDH.



## COX-2 72 kDa in Figure 7

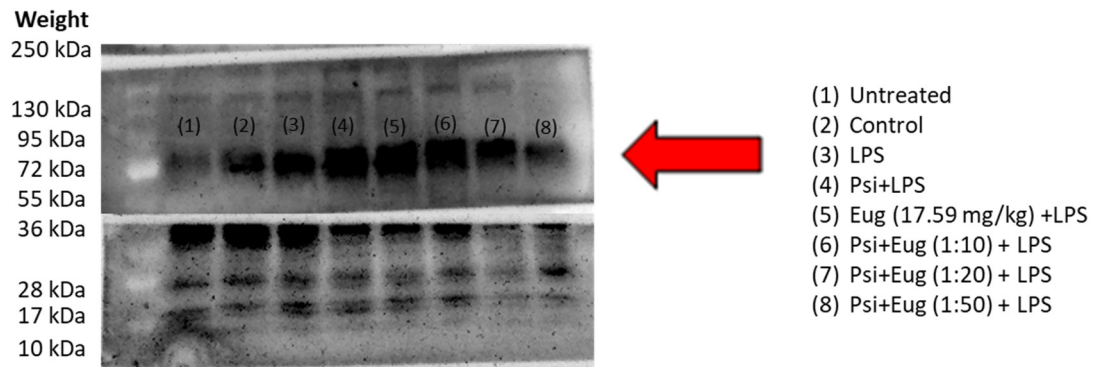

**Figure S9.** Original Western blots of brain tissue proteins showing COX-2 (molecular weight is 72 kDa). Red arrow indicates bands shown in Figure 7. This blot membrane has been cut in 2 pieces. Each piece received different exposure time and images has been taken separately.

## IL-1 $\beta$ 17 kDa in Figure 7

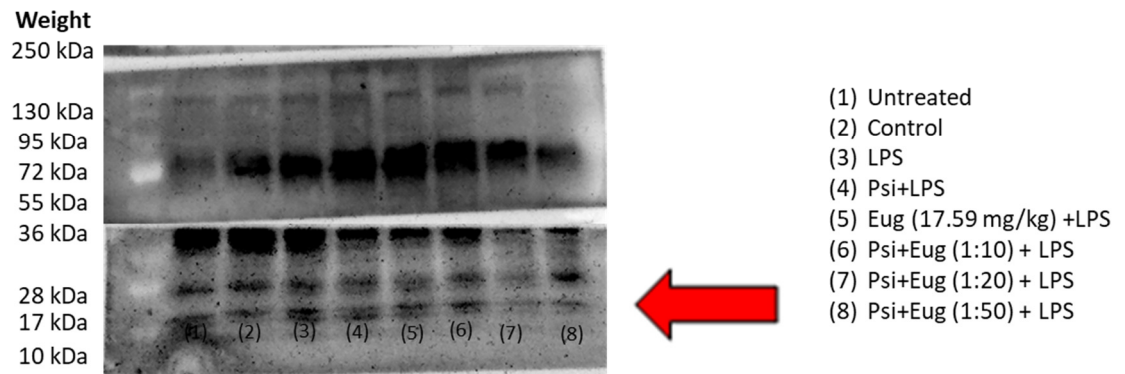

**Figure S10.** Original Western blots of brain tissue proteins showing IL-1 $\beta$  (molecular weight is 17 kDa). Red arrow indicates bands shown in Figure 7. This blot membrane has been cut in 2 pieces. Each piece received different exposure time and images has been taken separately.

## GAPDH 36 kDa in Figure 7

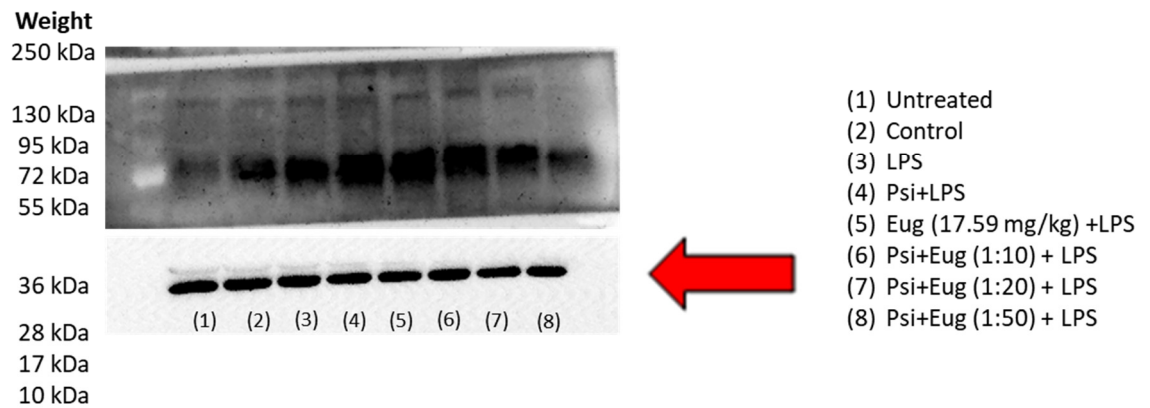

**Figure S11.** Original Western blots of brain tissue proteins showing GAPDH (molecular weight is 36 kDa). Red arrow indicates bands shown in Figure 7. This blot membrane has been cut in 2 pieces. Each piece received different exposure time and images has been taken separately. Bottom piece has been re-blotted and re-incubated with GAPDH.

**Table S1.** Antibodies used for Western blots

| <b>Antibody</b>         | <b>Supplier, Cat No</b> | <b>Dilution</b>          |
|-------------------------|-------------------------|--------------------------|
| Mouse anti-GAPDH (0411) | Santa Cruz, sc-47724    | 1:5000 in 5% milk (PBST) |
| Bovine anti-Mouse       | Santa Cruz, sc-2371     | 1:5000 in 5% milk (PBST) |
| Donkey anti-Rabbit      | Santa Cruz, sc-2313     | 1:5000 in 5% milk (PBST) |
| COX-2 (29)              | Santa Cruz, sc-19999    | 1:5000 in 5% milk (PBST) |
| IL-1 $\beta$ (B122)     | Santa Cruz, sc-12742    | 1:5000 in 5% milk (PBST) |

**Abcam**, Abcam Inc, Cambridge, United Kingdom; **BSA**, Bovine Serum Albumin; **PBST**, 1x Phosphate-Buffered Saline, 0.1 % Tween® 20; **Santa Cruz**, Santa Cruz Biotechnology, Inc., Texas, United States; **Cell Signaling**, Cell Signaling Technologies, Massachusetts, United States

**Table S2.** Primer sequences for qPCR analysis

| Target Gene                          | Sequence Forward (5' → 3') | Sequence Reverse (5' → 3') |
|--------------------------------------|----------------------------|----------------------------|
| <i>IL1B</i><br>ACC# NM_008361.4      | CAGGCAGGCAGTATCACTCATT     | AAGAAGGTGCTCATGTCCTCATC    |
| <i>TNFA</i><br>ACC# NM_001278601.1   | GCCTCTTCTCATTCCTGCTTGT     | TGGGAACCTTCTCATCCCTTTGG    |
| <i>IL6</i><br>ACC# NM_001314054.1    | GACTTCCATCCAGTTGCCTTCT     | TATCCTCTGTGAAGTCTCCTCTCC   |
| <i>COX2</i><br>ACC# NM_011198.4      | CCTTCTCCAACCTCTCCTACTACA   | AGCTCCTTATTTCCCTTCACACC    |
| <i>Amylase a</i><br>ACC# nm-011198.4 | GGACTTTCCTGGAGTTCCTATTCT   | CCTGAGCAGCATCTTGCTAGTT     |
| <i>GAPDH</i><br>ACC# XM_036165840.1  | CATCACTGCCACCCAGAAGA       | AGTGGATGCAGGGATGATGTT      |

**Table S3.** Significance Matrix for Body Weight Change in Figure 3. ANOVA & Tukey ( $n=4-6$ ) Significance ( $p$ ) is indicated within the figures using the following scale: \*,  $p < 0.05$ ; \*\*,  $p < 0.01$ ; \*\*\*,  $p < 0.001$ ; \*\*\*\*,  $p < 0.0001$ .

|                        | Untreated | LPS + Psi + Eug (1:50) | LPS + Psi + Eug (1:20) | LPS + Psi + Eug (1:10) | LPS + EUG | LPS + Psi | Control - Post | PSi + Eug (1:50) + LPS | PSi + Eug (1:20) + LPS | PSi + Eug (1:10) + LPS | Eug + LPS | Psi + LPS | LPS | PSi + Eug (1:10) | Eug | Psi | Control - Pre |
|------------------------|-----------|------------------------|------------------------|------------------------|-----------|-----------|----------------|------------------------|------------------------|------------------------|-----------|-----------|-----|------------------|-----|-----|---------------|
| Untreated              |           | **                     | *                      | **                     | **        | *         | ns             | **                     | ****                   | ***                    | ****      | ***       | **  | ns               | ns  | ns  | ns            |
| LPS + Psi + Eug (1:50) | **        |                        | ns                     | ns                     | ns        | ns        | **             | ns                     | ns                     | ns                     | ns        | ns        | ns  | ns               | ns  | ns  | ns            |
| LPS + Psi + Eug (1:20) | *         | ns                     |                        | ns                     | ns        | ns        | **             | ns                     | ns                     | ns                     | ns        | ns        | ns  | ns               | ns  | ns  | ns            |
| LPS + Psi + Eug (1:10) | **        | ns                     | ns                     |                        | ns        | ns        | ***            | ns                     | ns                     | ns                     | ns        | ns        | ns  | ns               | ns  | ns  | ns            |
| LPS + EUG              | **        | ns                     | ns                     | ns                     |           | ns        | ns             | ns                     | ns                     | ns                     | ns        | ns        | ns  | ns               | ns  | ns  | ns            |
| LPS + Psi              | *         | ns                     | ns                     | ns                     | ns        |           | **             | ns                     | ns                     | ns                     | ns        | ns        | ns  | ns               | ns  | ns  | ns            |
| Control - Post         | ns        | **                     | **                     | ***                    | ns        | **        |                | ***                    | ****                   | ***                    | ****      | ****      | **  | ns               | ns  | ns  | ns            |
| PSi + Eug (1:50) + LPS | **        | ns                     | ns                     | ns                     | ns        | ns        | ***            |                        | ns                     | ns                     | ns        | ns        | ns  | ns               | ns  | ns  | ns            |
| PSi + Eug (1:20) + LPS | ****      | ns                     | ns                     | ns                     | ns        | ns        | ****           | ns                     |                        | ns                     | ns        | ns        | ns  | *                | *   | *   | ns            |
| PSi + Eug (1:10) + LPS | ***       | ns                     | ns                     | ns                     | ns        | ns        | ***            | ns                     | ns                     |                        | ns        | ns        | ns  | ns               | ns  | ns  | ns            |
| Eug + LPS              | ****      | ns                     | ns                     | ns                     | ns        | ns        | ****           | ns                     | ns                     | ns                     |           | ns        | ns  | **               | *   | **  | *             |
| Psi + LPS              | ***       | ns                     | ns                     | ns                     | ns        | ns        | ****           | ns                     | ns                     | ns                     | ns        |           | ns  | ns               | ns  | ns  | ns            |
| LPS                    | **        | ns                     | ns                     | ns                     | ns        | ns        | **             | ns                     | ns                     | ns                     | ns        | ns        |     | ns               | ns  | ns  | ns            |
| PSi + Eug (1:10)       | ns        | ns                     | ns                     | ns                     | ns        | ns        | ns             | ns                     | *                      | ns                     | **        | ns        | ns  |                  | ns  | ns  | ns            |
| Eug                    | ns        | ns                     | ns                     | ns                     | ns        | ns        | ns             | ns                     | *                      | ns                     | *         | ns        | ns  | ns               |     | ns  | ns            |
| Psi                    | ns        | ns                     | ns                     | ns                     | ns        | ns        | ns             | ns                     | *                      | ns                     | **        | ns        | ns  | ns               | ns  |     | ns            |
| Control - Pre          | ns        | ns                     | ns                     | ns                     | ns        | ns        | ns             | ns                     | ns                     | ns                     | *         | ns        | ns  | ns               | ns  | ns  |               |

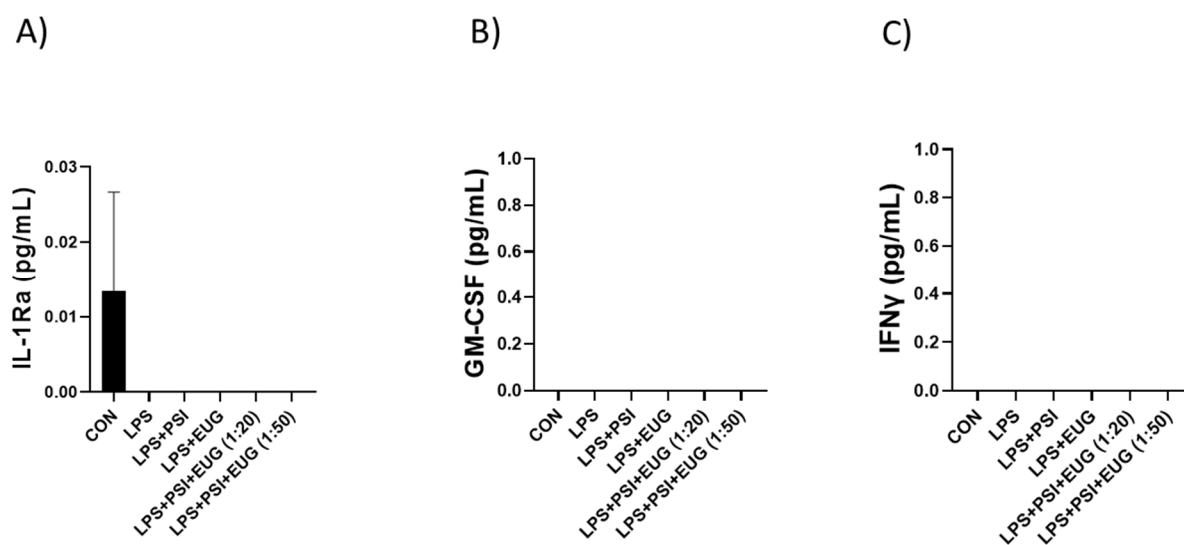

**Figure S12.** The content of inflammatory cytokines in post-treatment LPS-induced inflammation in brain tissue in Figure 8. The levels of (A) IL-1Ra, (B) GM-CSF, (C) IFN $\gamma$ . Data were analyzed with ANOVA & Tukey ( $n=3$ ). Bars represent Mean  $\pm$  SEM.

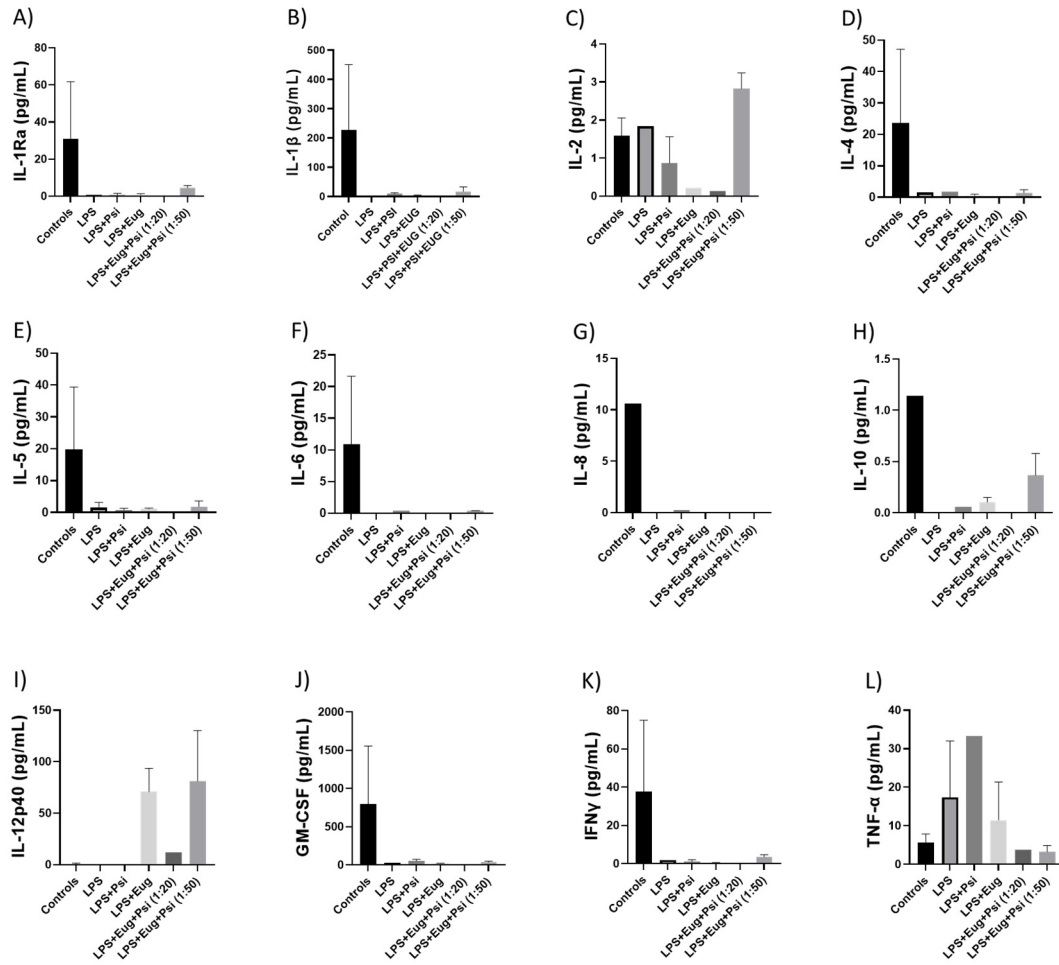

**Figure S13.** The content of proinflammatory cytokines in post-treatment LPS-induced inflammation in blood in Figure 9. The levels of (A) IL-1Ra, (B) IL-1 $\beta$ , (C) IL-2, (D) IL-4, (E) IL-5, (F) IL-6, (G) IL-8, (H) IL-10, (I) IL-12p40, (J) GM-CSF, (K) IFN $\gamma$ , (L) TNF $\alpha$ . Data were analyzed with ANOVA & Tukey ( $n=1-3$ ). Bars represent Mean  $\pm$  SEM.
